# Supplementary material for: A porous anionic zinc(ii) metal–organic framework for gas adsorption, selective uptake of dyes and sensing of Fe3+ by Tb3+ ion encapsulation
Source: Royal Society of Chemistry journal article supplement (doi:10.1039/d1ce01074c), 2021-01-01
Supplement: d1ce01074c1.pdf [file d1ce01074c1.pdf]

*Supporting Information for*

**A porous anionic zinc(II) metal-organic framework for gas adsorption,  
selective uptake of dyes and sensing of Fe<sup>3+</sup> by Tb<sup>3+</sup> ion encapsulation**

Yu-Jie Liang,<sup>‡</sup> Jun Yao,<sup>‡</sup> Min Deng, Yan-E Liu, Quan-Qing Xu, Qiu-Xia Li, Bi Jing, Ai-Xin Zhu\* and

Bo Huang\*

*Faculty of Chemistry and Chemical Engineering, Yunnan Normal University, Kunming 650500, China.*

E-mail: zaxchem@126.com (Ai-Xin Zhu) and huangbo15@foxmail.com (Bo Huang);

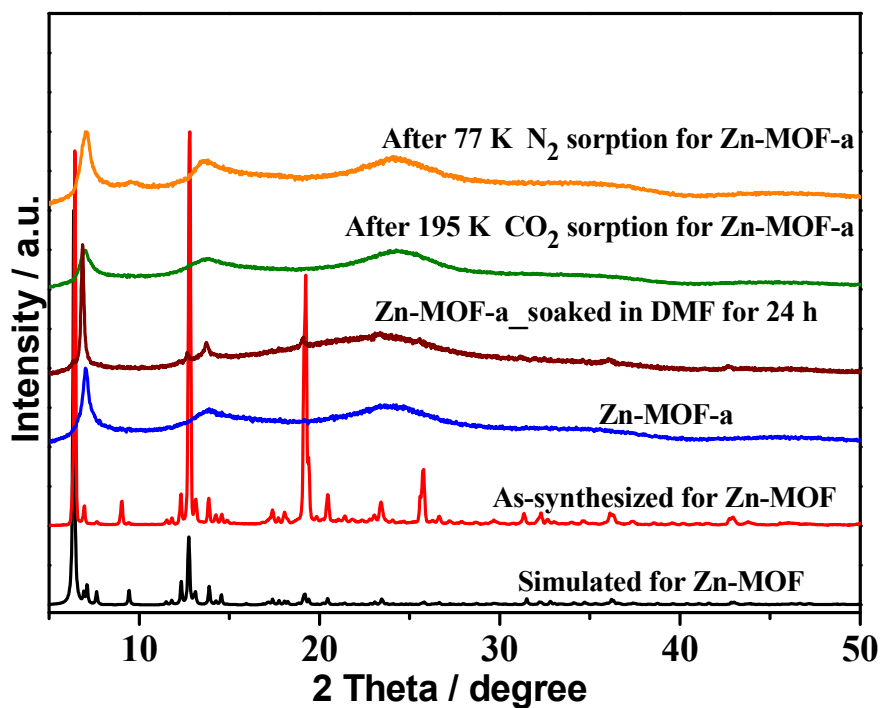

**Fig. S1** PXRD patterns of Zn-MOF, Zn-MOF-a, Zn-MOF-a after being soaked in DMF for 24 h, and Zn-MOF-a after sorption of N<sub>2</sub> at 77 K and CO<sub>2</sub> at 195 K.

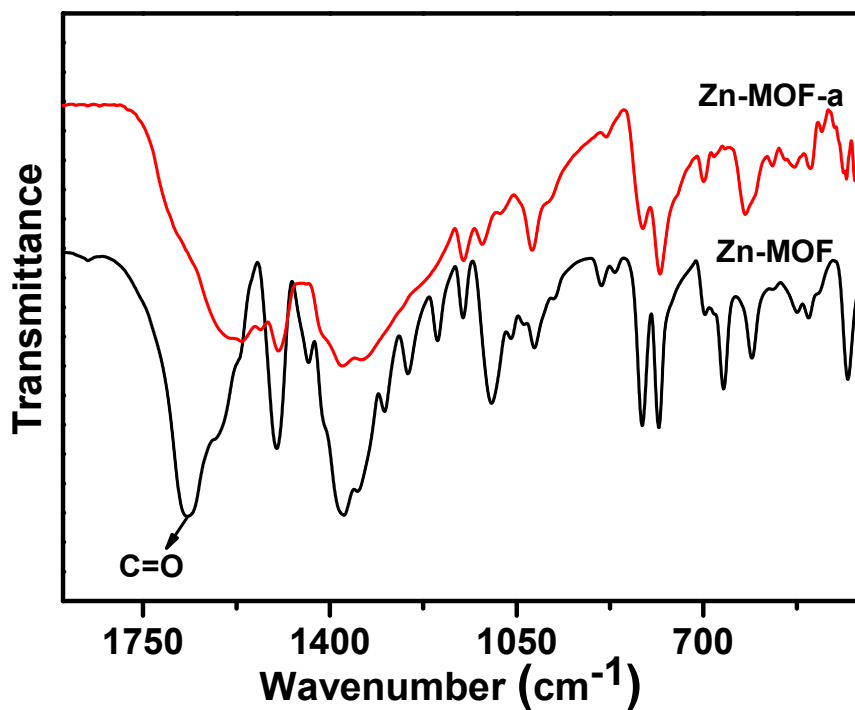

**Fig. S2** FT-IR spectra of Zn-MOF and Zn-MOF-a. The lack of C=O stretching peaks at about 1668 cm<sup>-1</sup> in the IR spectra of Zn-MOF-a confirms the full release of DMF guests.

## The calculation of Langmuir surface area

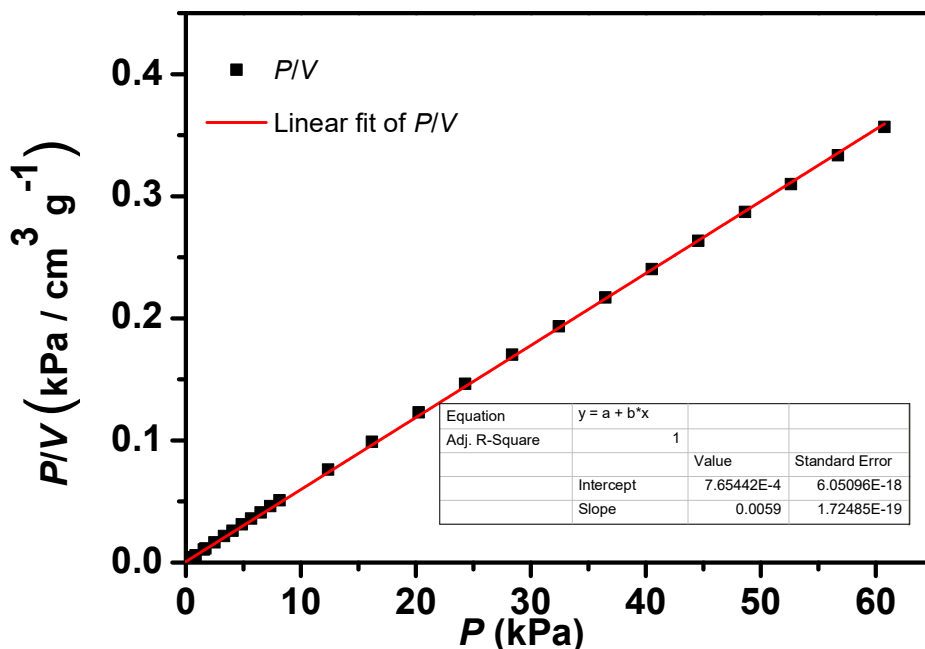

**Fig. S3** Langmuir plot for the N<sub>2</sub> adsorption isotherm of Zn-MOF-a at 77 K, and the range  $P$  from 0.0001125 to 60.75 KPa satisfies for applying the Langmuir theory.

The adsorption isotherms were converted into plots of  $P/V$  vs.  $P$  for determining the appropriate range. As shown in Fig. S3, the range  $P$  from 0.0001125 to 60.75 KPa satisfies for applying the Langmuir theory. After having identified the appropriate low pressure Langmuir  $P$  range, the analysis proceeds according to the standard method via the linearized Langmuir equation.

$$P/V = P/V_m + 1/BV_m$$

from which the parameters  $V_m$  is obtained from the relation  $V_m = 1/s$ ,  $s$  being the slope with the ordinate of the plot  $P/V$  vs.  $P$ . The surface area is then obtained from  $A_{\text{Langmuir}} = V_m \sigma_m N_A$  with  $\sigma_m$  being the cross-sectional area of N<sub>2</sub> at liquid density ( $16.25 \times 10^{-20}$  m<sup>2</sup>), and  $N_A$  Avogadro's number ( $6.023 \times 10^{23}$ ).

## The calculation of BET surface area

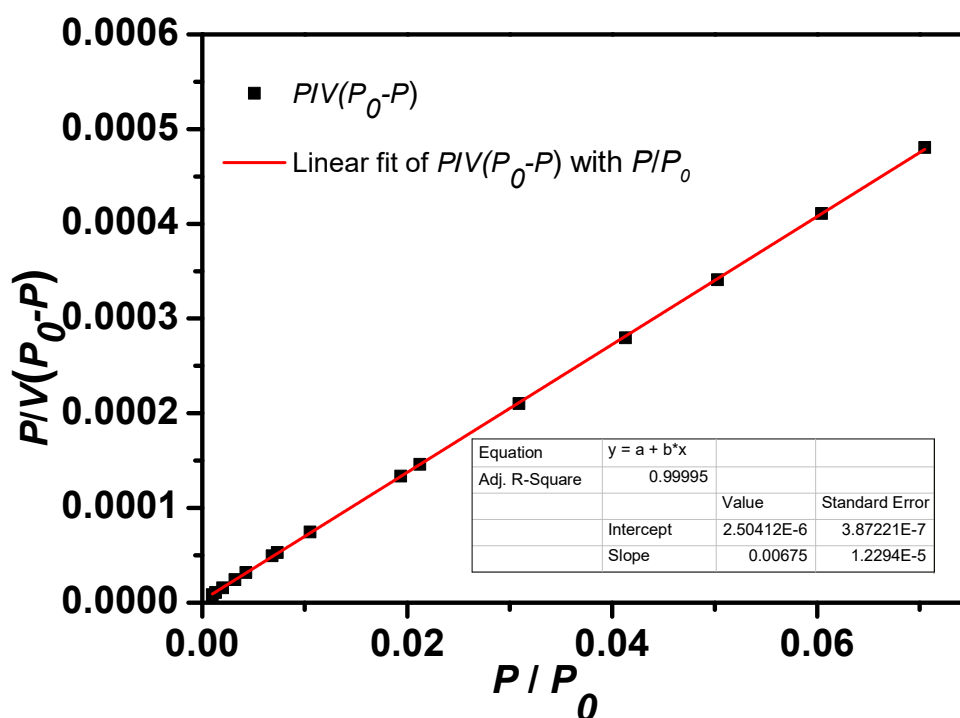

**Fig. S4** BET plot for the N<sub>2</sub> adsorption isotherm of Zn-MOF-a at 77 K, and the range  $P/P_0$  from 0.0035 to 0.04 satisfies for applying the BET theory.

The adsorption isotherms were converted into plots of  $1/[V(P_0/P - 1)]$  vs.  $P/P_0$  for determining the appropriate range. As shown in Fig. S4, the range  $P/P_0$  from 0.0035 to 0.04 satisfies for applying the BET theory. After having identified the appropriate low pressure BET  $P/P_0$  range, the analysis proceeds according to the standard method via the linearized BET equation.

$$\frac{P}{V(P_0 - P)} = \frac{1}{V_m c} + \frac{(C-1) P}{V_m c P_0}$$

from which the BET parameters  $c$  is obtained from the relation  $c = s/i + 1$ ,  $s$  being the slope and  $i$  being the intercept with the ordinate of the plot  $1/[V(P_0/P - 1)]$  vs.  $P/P_0$ . The parameter  $V_m$  is then given by  $V_m = 1/(s + i)$ . The surface area is then obtained from  $A_{\text{BET}} = V_m \sigma_m N_A$  with  $\sigma_m$  being the cross-sectional area of N<sub>2</sub> at liquid density ( $16.25 \times 10^{-20} \text{ m}^2$ ), and  $N_A$  Avogadro's number ( $6.023 \times 10^{23}$ ).

## Calculation of enthalpy of adsorption ( $Q_{st}$ ) for CO<sub>2</sub>

$$\ln P = \ln N + \sum_{i=0}^m a_i N^i + \sum_{i=0}^n \binom{n}{k} b_i N^i$$

$$Q_{st} = -R \sum_{i=0}^m a_i N^i$$

A virial-type expression of the above form was used to fit the combined isotherm data of CO<sub>2</sub> for **Zn-MOF-a** at 273, 283 and 298 K, where  $P$  is the pressure described in Pa,  $N$  is the adsorbed amount in mmol/g,  $T$  is the temperature in K,  $a_i$  and  $b_i$  are virial coefficients, and  $m$  and  $n$  are the number of coefficients used to describe the isotherms.  $Q_{st}$  is the coverage-dependent enthalpy of adsorption and  $R$  is the universal gas constant.

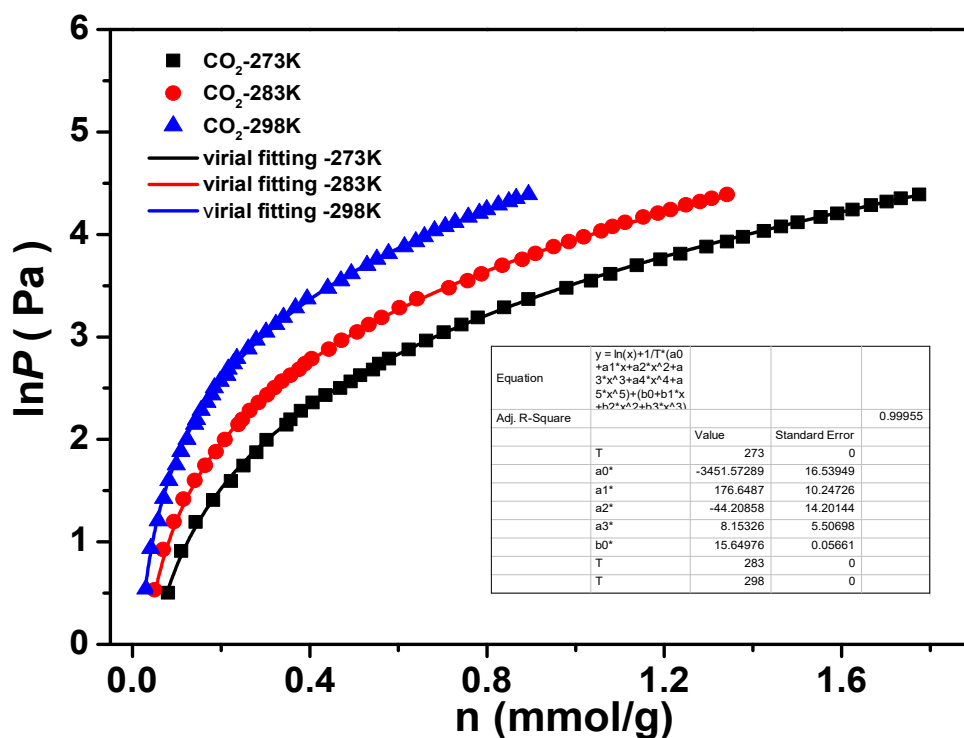

Fig. S5 The virial fitting of CO<sub>2</sub> sorption data for Zn-MOF-a.

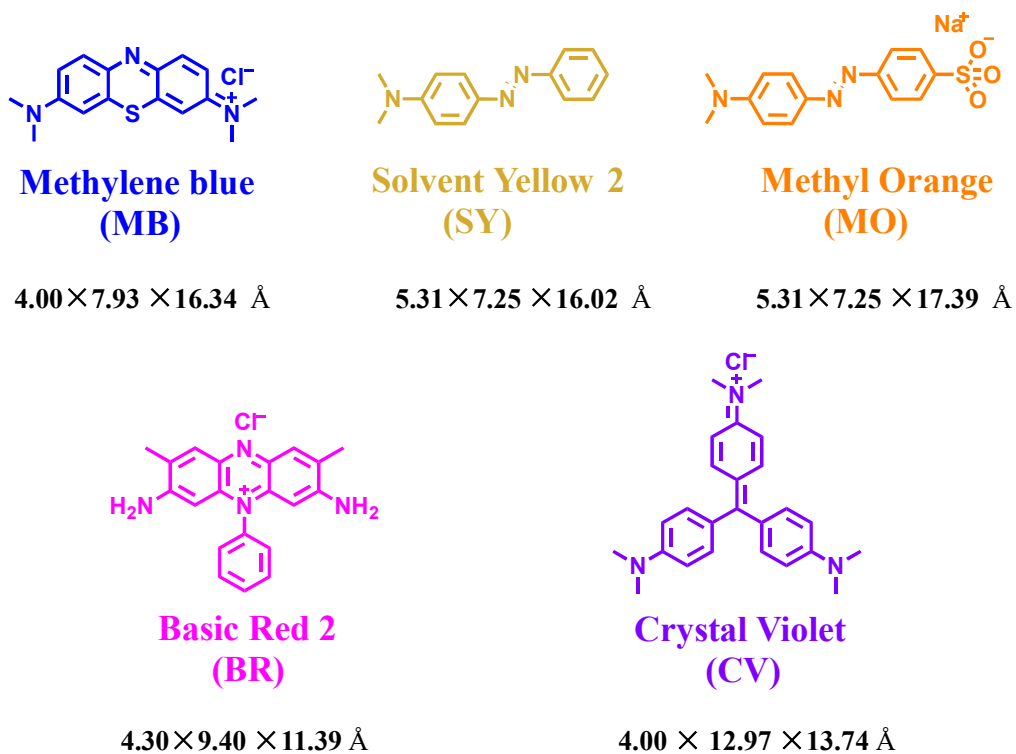

**Scheme S1** Chemical Structures of five organic dyes with different charge and size.

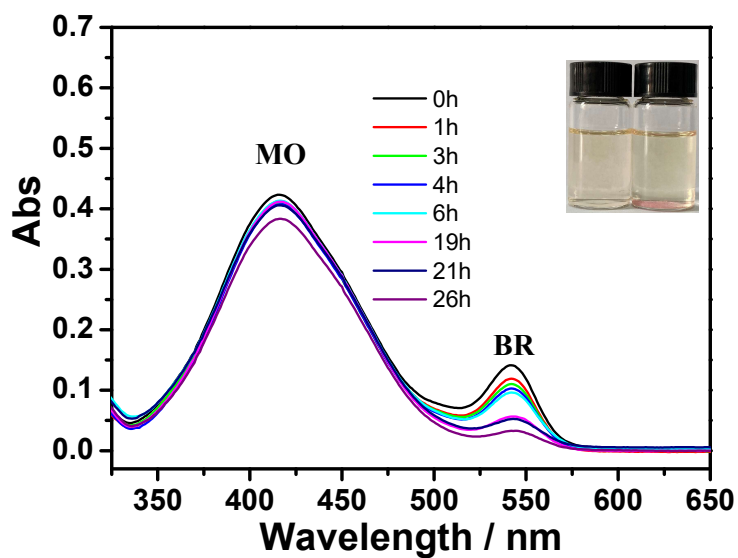

**Fig. S6** Selective adsorption capability of mixed dyes MO & BR for **Zn-MOF**.

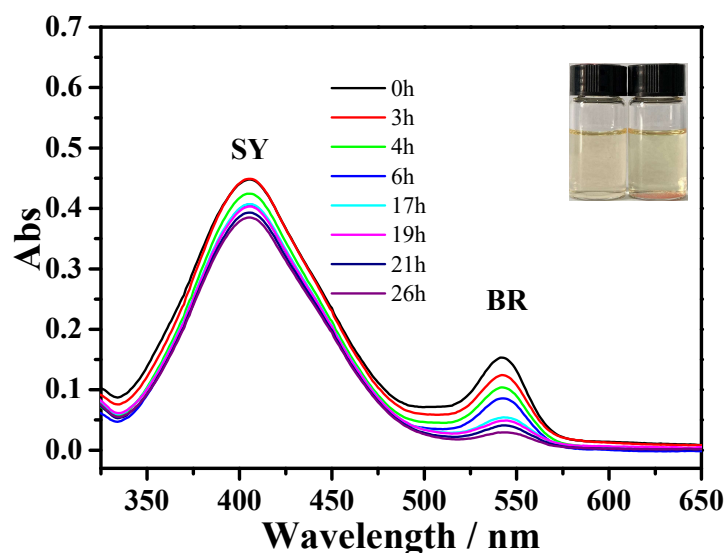

**Fig. S7** Selective adsorption capability of mixed dyes SY & BR for **Zn-MOF**.

### Reusability experiment for dyes adsorption

For each cycle of dyes adsorption, the samples (20 mg) were added to a 4 mL EtOH solution of each cationic dyes ( $1.0 \times 10^{-5} \text{ mol}\cdot\text{L}^{-1}$ ), and the UV-vis spectra of the solution were collected at room temperature before and after the crystals of **Zn-MOF** addition for 26 h to check the recyclable and reusable ability. After each cycle of dyes adsorption, the regeneration of **Zn-MOF** was achieved by the following procedure: the dye-adsorbed samples (**dye@Zn-MOF**) were soaked in a saturated EtOH solution of LiCl for 30 min, the solution were replaced with a new saturated EtOH solution of LiCl for several times until the solution has no color change, and then the sample were filtered and dry at room temperature.

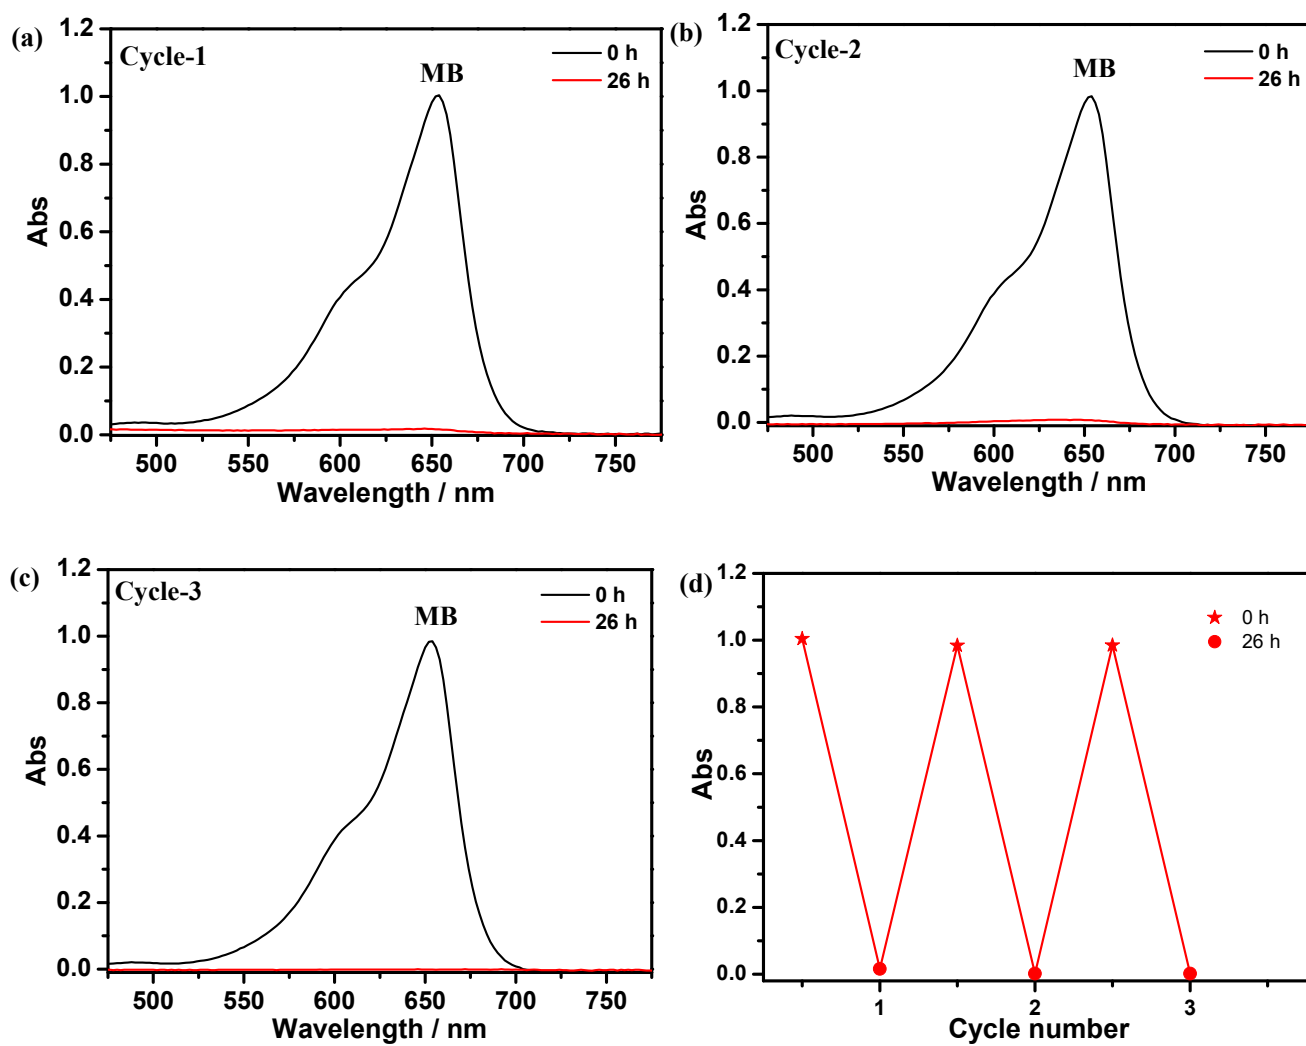

**Fig. S8** The three cycles of MB absorption by Zn-MOF. (a) the first cycle of MB absorption; (b) the second cycle of MB absorption; (c) the third cycle of MB absorption; (d) the adsorption ability of 3 cycles of MB adsorption.



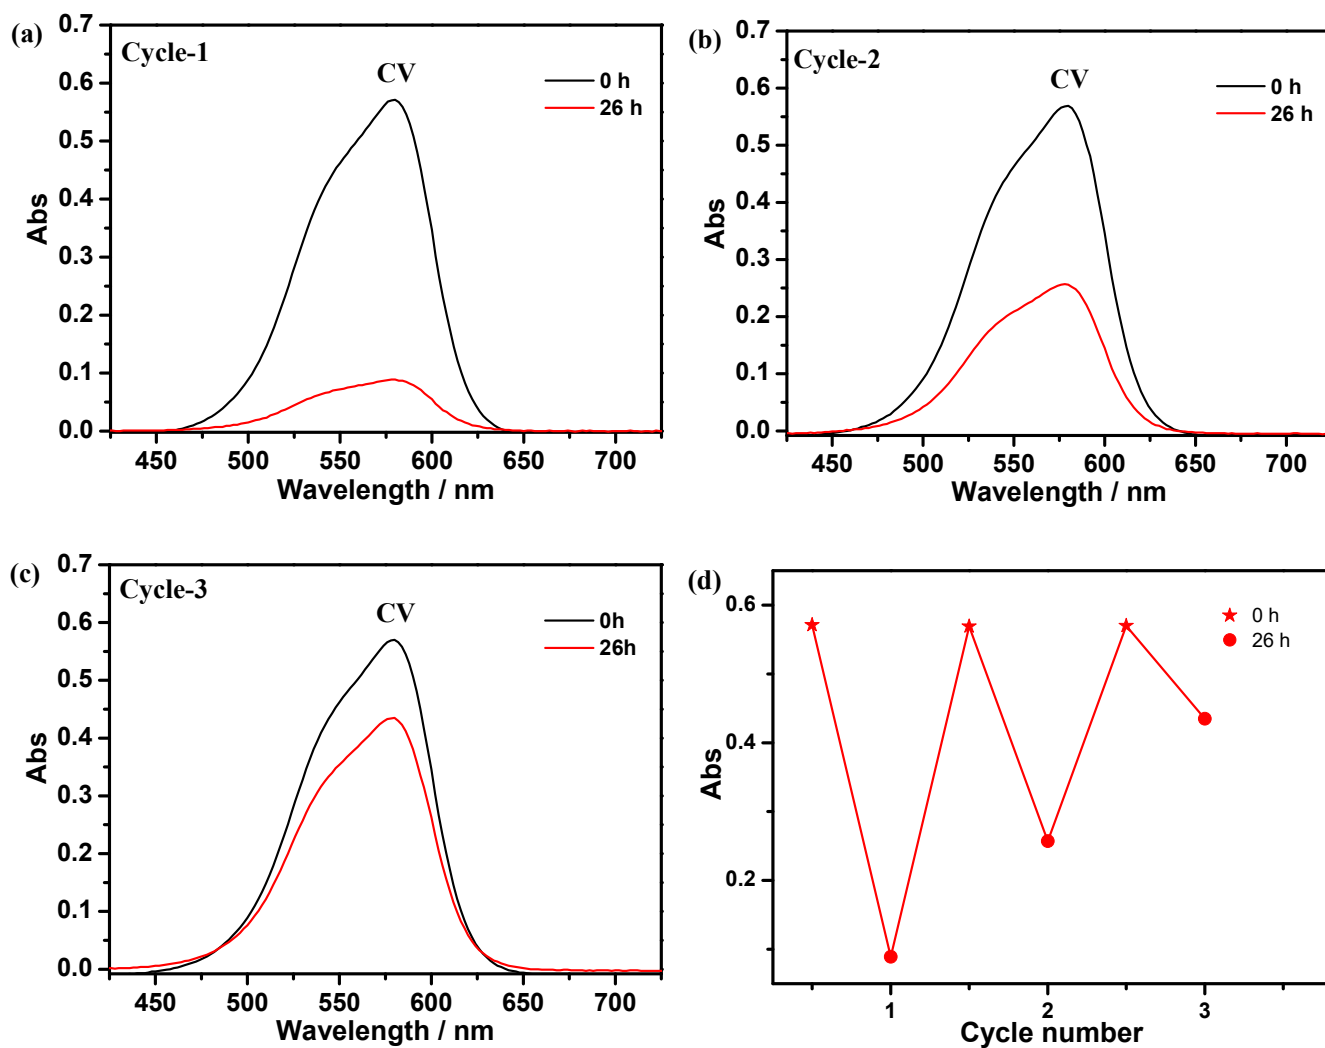

**Fig. S9** The three cycles of CV absorption by Zn-MOF. (a) the first cycle of CV absorption; (b) the second cycle of MB absorption; (c) the third cycle of CV absorption; (d) the adsorption ability of 3 cycles of CV adsorption.

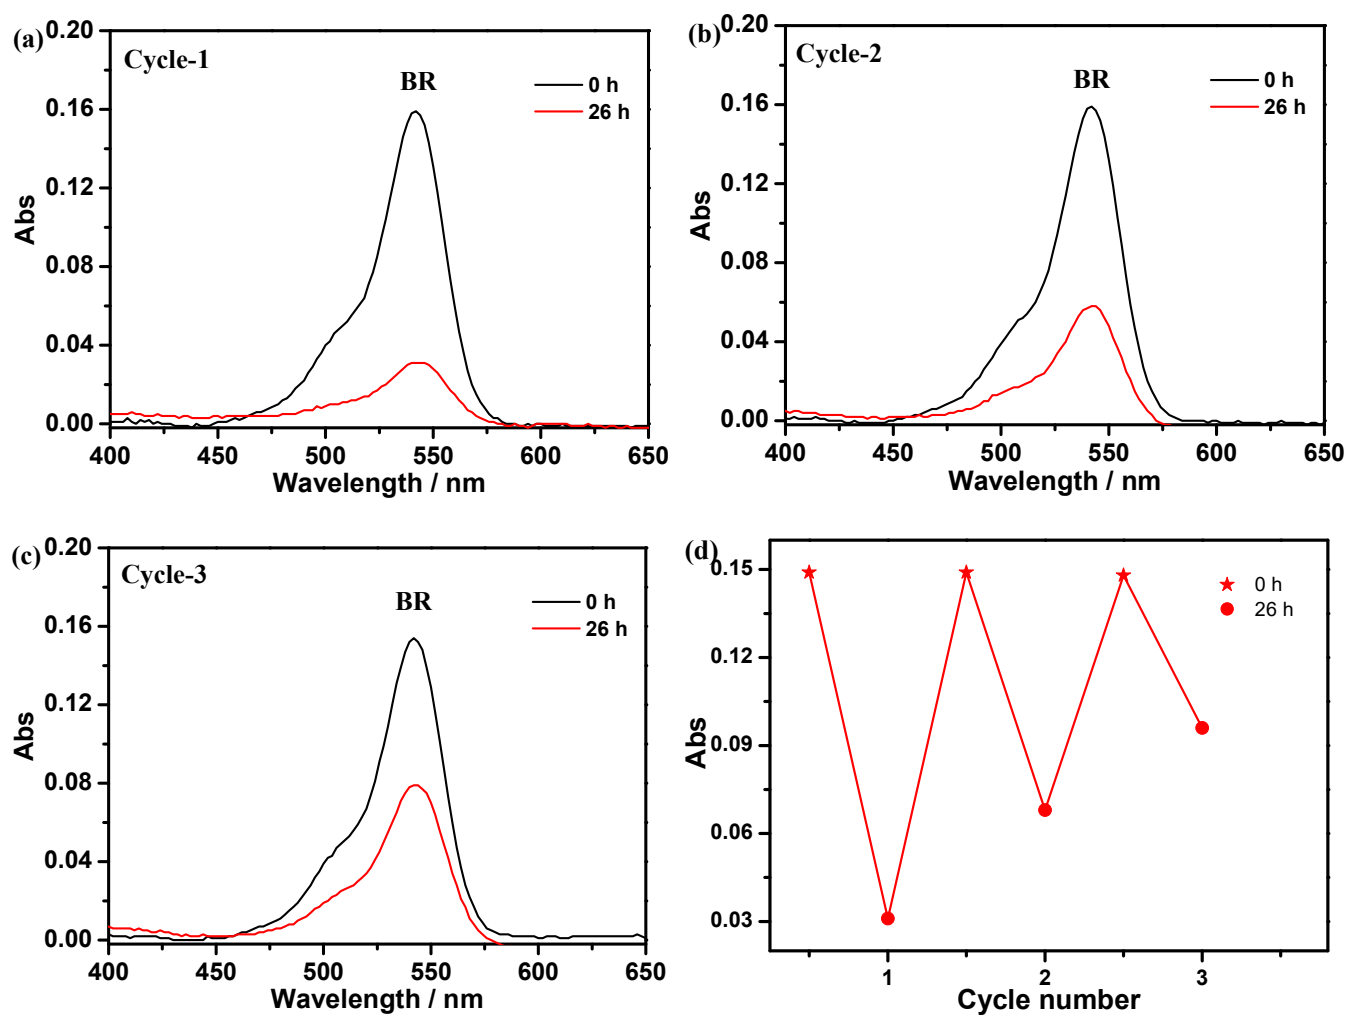

**Fig. S10** The three cycles of BR absorption by **Zn-MOF**. (a) the first cycle of BR absorption; (b) the second cycle of MB absorption; (c) the third cycle of BR absorption; (d) the adsorption ability of 3 cycles of BR adsorption.

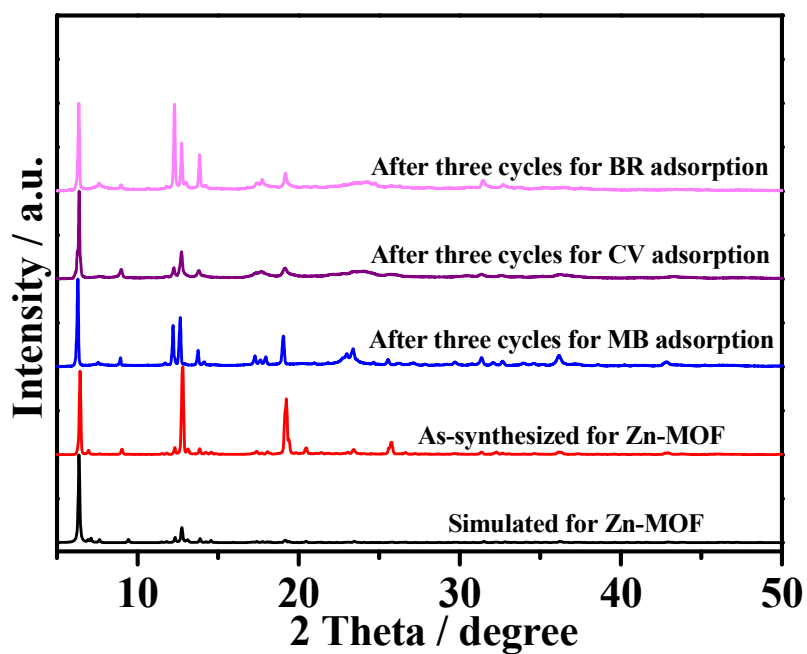

**Fig. S11** PXRD patterns of **Zn-MOF** after three cycles of dyes adsorption.

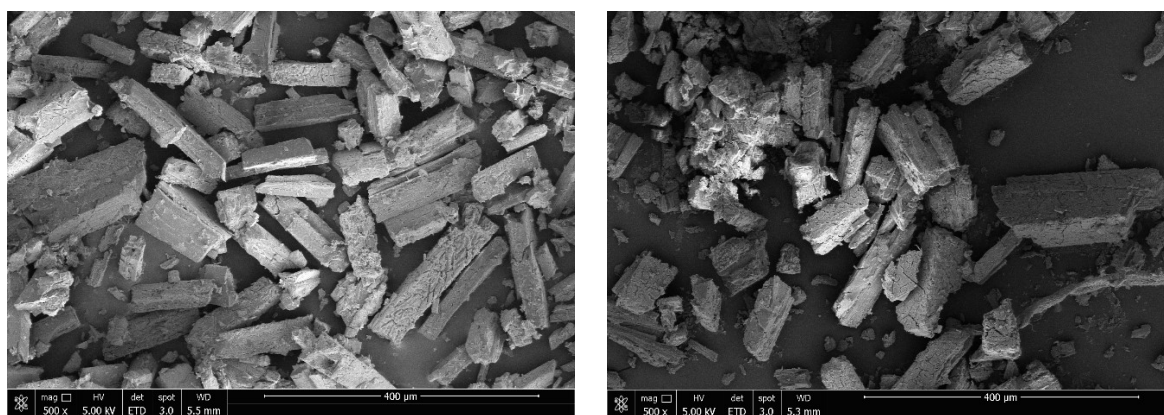

**Fig. S12** (a) SEM image of  $\text{Tb}^{3+}@\text{Zn-MOF}$ . (b) SEM image of  $\text{Tb}^{3+}@\text{Zn-MOF}$  after being soaking in EtOH solution of  $\text{Fe}(\text{NO}_3)_3$  for 12 h.

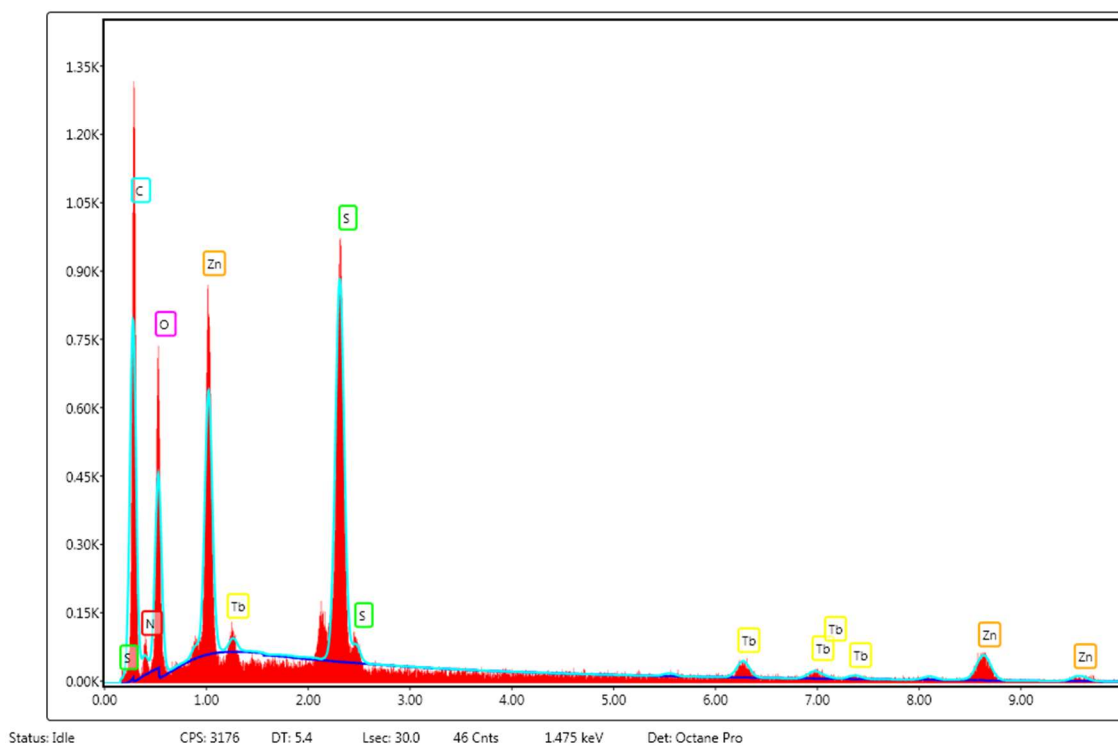

**Fig. S13** The SEM-EDS analysis for  $\text{Tb}^{3+}@\text{Zn-MOF}$ .

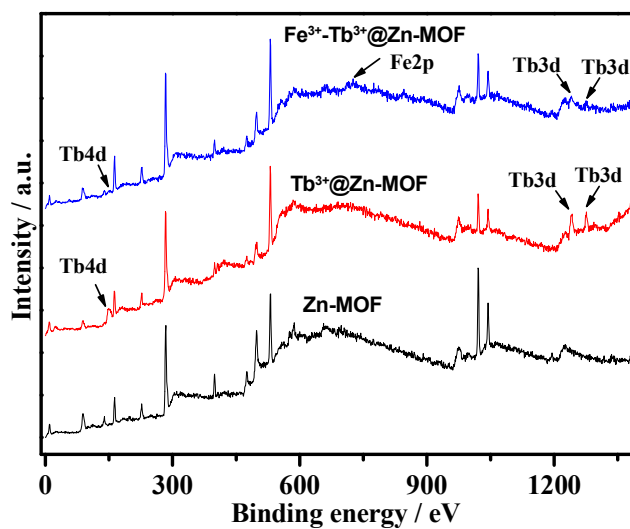

**Fig. S14** XPS low-resolution survey scan of  $\text{Zn-MOF}$ ,  $\text{Tb}^{3+}@\text{Zn-MOF}$  and the sample of  $\text{Tb}^{3+}@\text{Zn-MOF}$  after  $\text{Fe}^{3+}$  addition.

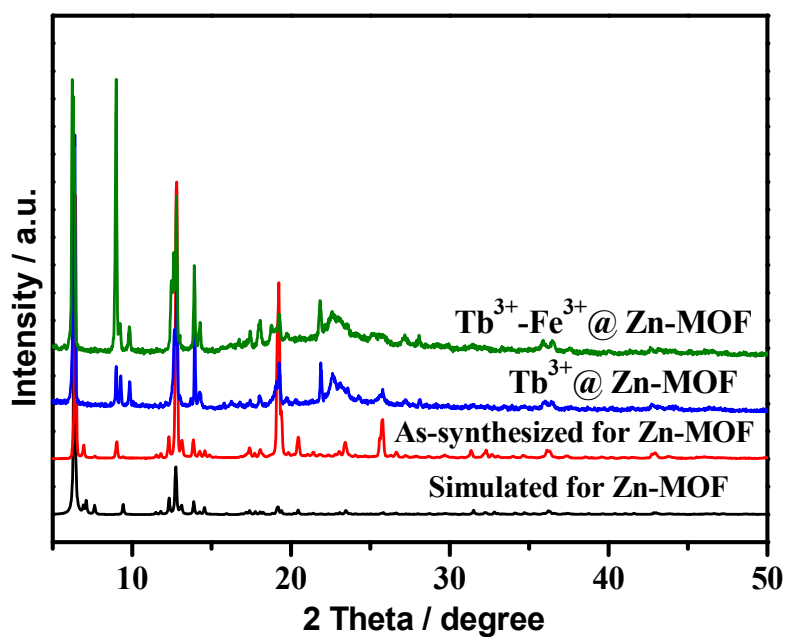

**Fig. S15** PXR D patterns of for **Zn-MOF**, **Tb<sup>3+</sup>@Zn-MOF** and the sample of **Tb<sup>3+</sup>@Zn-MOF** after being soaking in EtOH solution of **Fe(NO<sub>3</sub>)<sub>3</sub>** for 12 h.

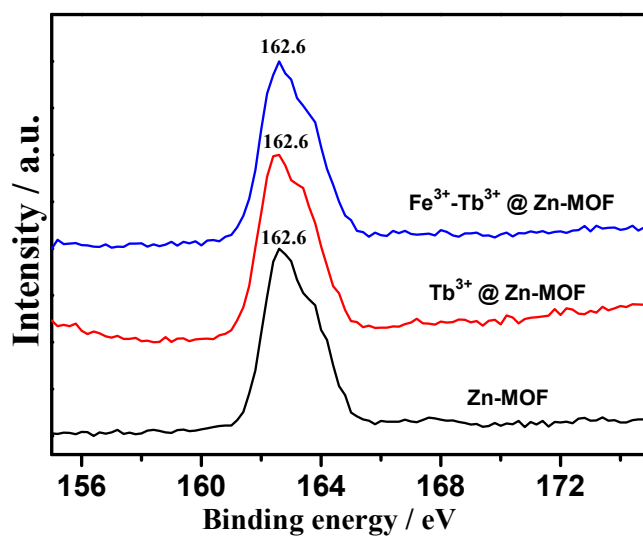

**Fig. S16** XPS high-resolution survey scans of S2p for **Zn-MOF**, **Tb<sup>3+</sup>@Zn-MOF** and the sample of **Tb<sup>3+</sup>@Zn-MOF** after **Fe<sup>3+</sup>** sensing.

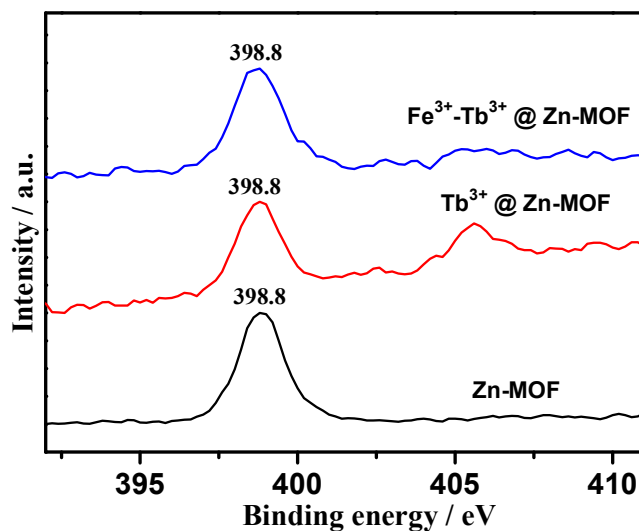

**Fig. S17** XPS high-resolution survey scans of N1s for **Zn-MOF**, **Tb<sup>3+</sup>@Zn-MOF** and the sample of **Tb<sup>3+</sup>@Zn-MOF** after Fe<sup>3+</sup> sensing.

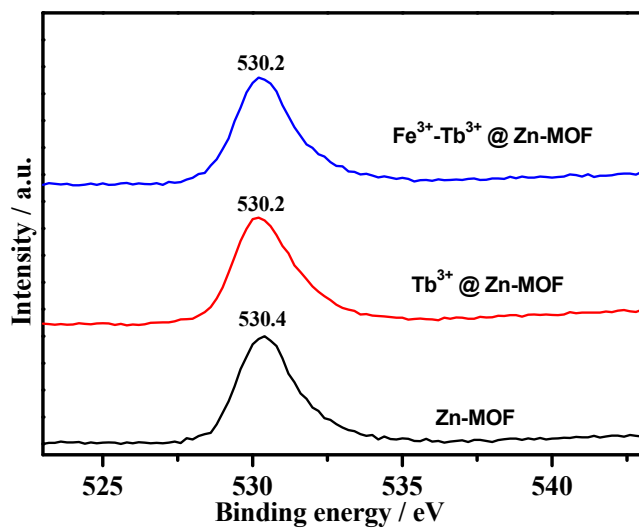

**Fig. S18** XPS high-resolution survey scans of O1s for **Zn-MOF**, **Tb<sup>3+</sup>@Zn-MOF** and the sample of **Tb<sup>3+</sup>@Zn-MOF** after Fe<sup>3+</sup> sensing.

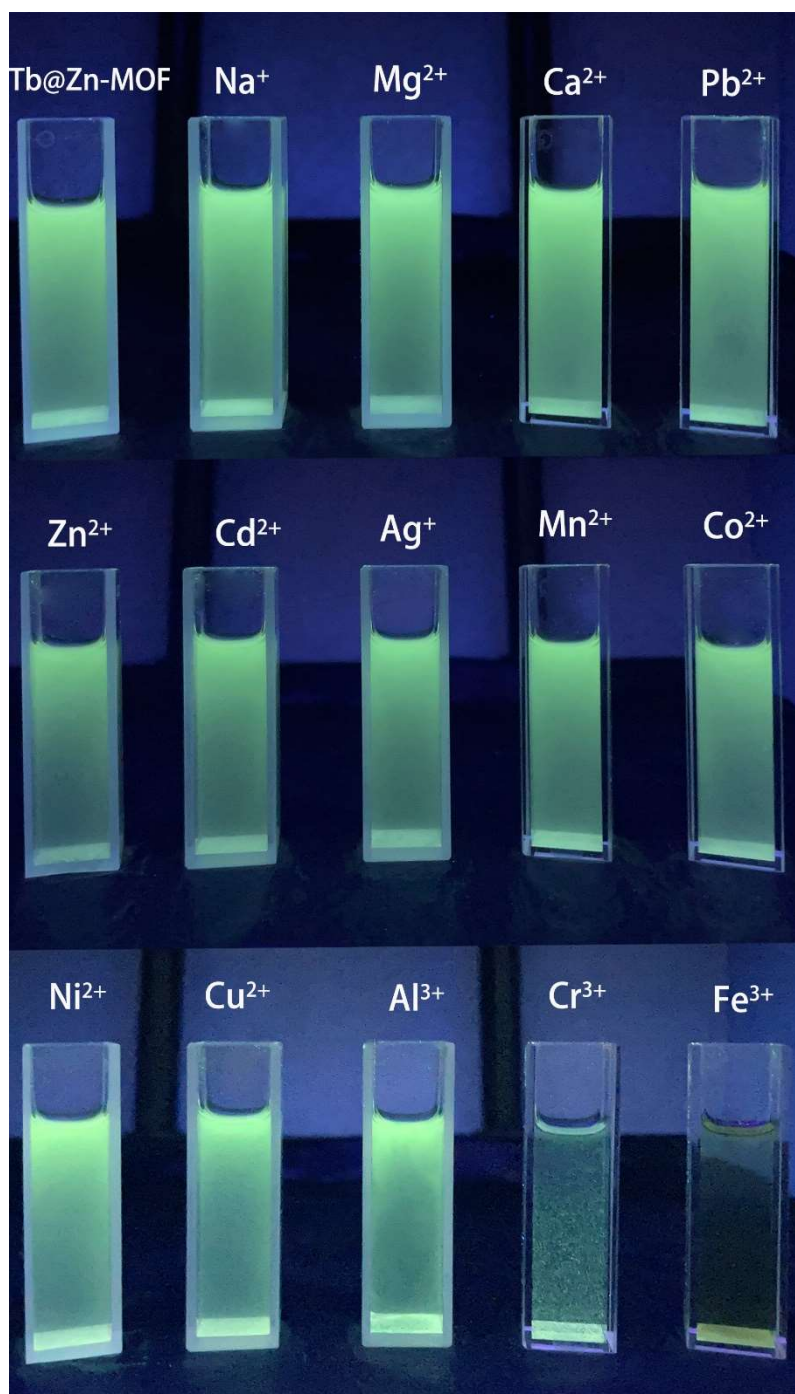

**Fig. S19** The photograph of Tb<sup>3+</sup>@Zn-MOF dispersed in EtOH with the addition of different metal ions under UV irradiation.

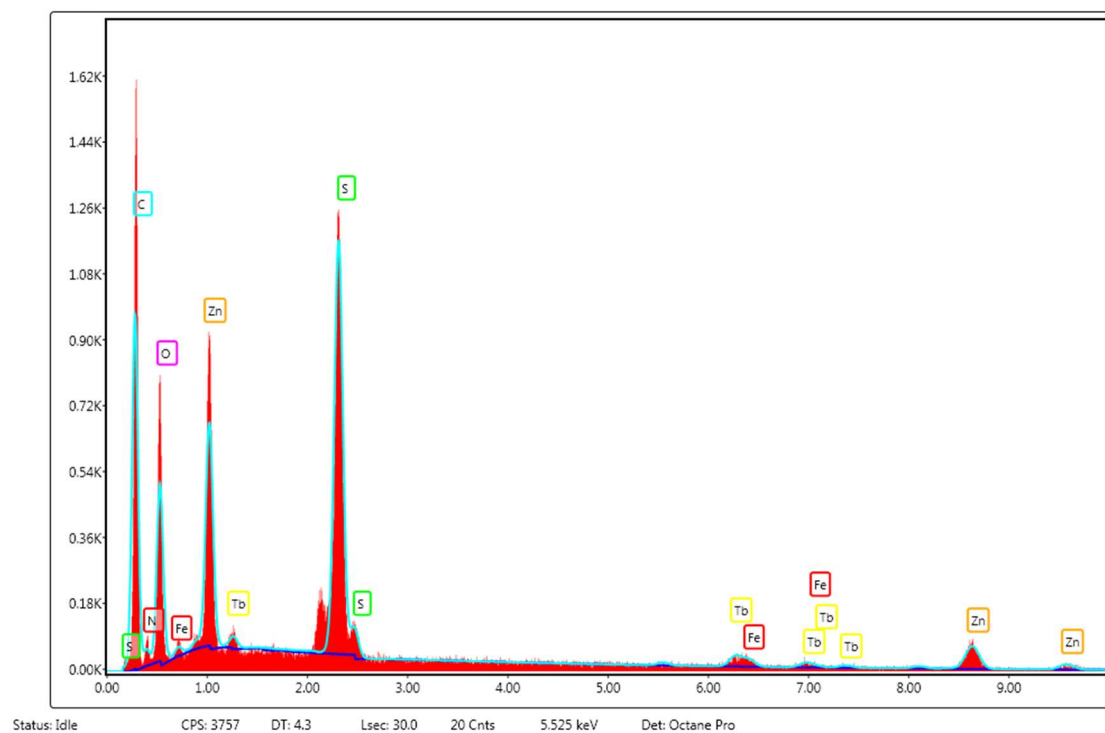

**Fig. S20** The SEM-EDS analysis for  $\text{Tb}^{3+}@\text{Zn-MOF}$  after being soaking in EtOH solution of  $\text{Fe}(\text{NO}_3)_3$ .

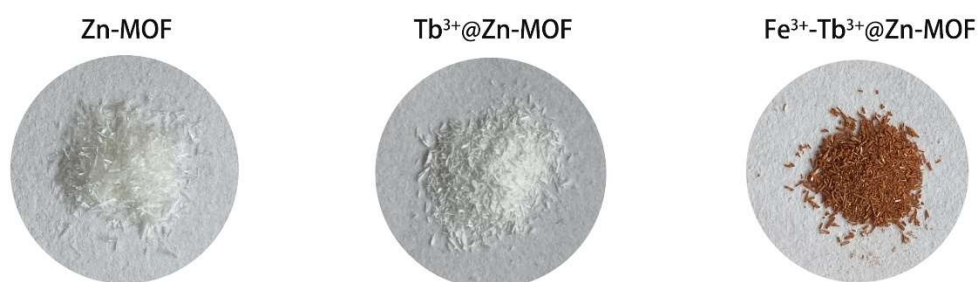

**Fig. S21** The photographs of  $\text{Zn-MOF}$ ,  $\text{Tb}^{3+}@\text{Zn-MOF}$  and  $\text{Fe}^{3+}$ -incorporated  $\text{Tb}^{3+}@\text{Zn-MOF}$ .



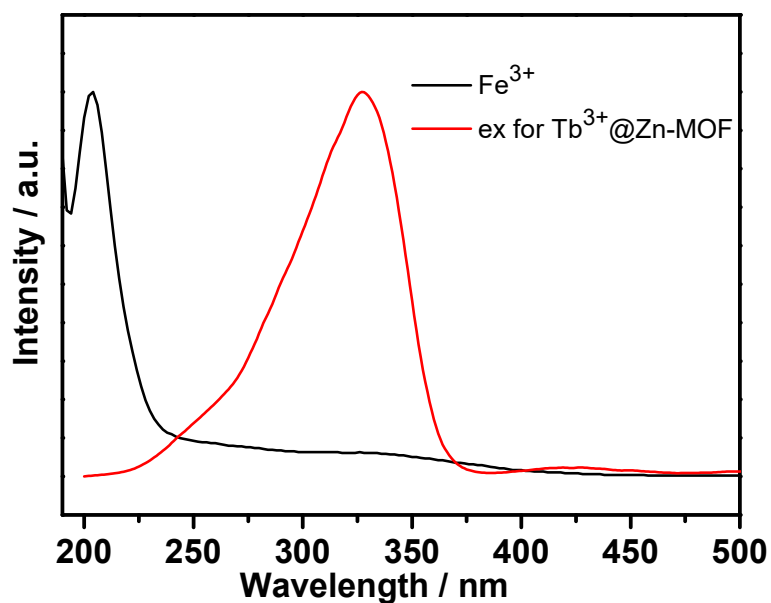

**Fig. S22** The excitation spectra of  $\text{Tb}^{3+}@\text{Zn-MOF}$  (dispersed in EtOH) and Uv-vis absorption spectrum of  $\text{Fe}(\text{NO}_3)_3$  in EtOH.

**Table S1** Summary of isosteric heat of adsorption ( $Q_{st}$ ) of  $\text{CO}_2$  for anionic metal-organic frameworks

| Compound                                                                                               | Using methods               | $Q_{st} / \text{KJ} \cdot \text{mol}^{-1}$ | Ref |
|--------------------------------------------------------------------------------------------------------|-----------------------------|--------------------------------------------|-----|
| $\text{H}_3[(\text{Cu}_4\text{Cl})_3(\text{BTri})_8]$                                                  | Clausius-Clapeyron equation | 21.0                                       | 1   |
| SNU-151'                                                                                               | Clausius-Clapeyron equation | 27.1                                       | 2   |
| FJI-C1                                                                                                 | virial methods              | 20.7                                       | 3   |
| $[\text{H}_2\text{N}(\text{Me})_2]_2[\text{Zn}_5(\text{L})_3]$                                         | virial methods              | 23.0                                       | 4   |
| ZJNU-55a                                                                                               | Clausius-Clapeyron equation | 35.4                                       | 5   |
| CPF-13                                                                                                 | virial methods              | 28.2                                       | 6   |
| JXNU-4                                                                                                 | virial methods              | 27.8                                       | 7   |
| Bio-MOF-1                                                                                              | Clausius-Clapeyron equation | 35.0                                       | 8   |
| $[(\text{CH}_3)_2\text{NH}_2]_3[\text{Zn}_4\text{Na}(\text{BPTC})_3]$                                  | Clausius-Clapeyron equation | 27.0                                       | 9   |
| $\{[\text{NH}_2(\text{CH}_3)_2][\text{Zn}(\text{atz})(\text{ox})] \cdot \text{H}_2\text{O}\}_n$        | Clausius-Clapeyron equation | 45.4                                       | 10  |
| $\{(\text{Me}_2\text{NH}_2)[\text{Co}_3(\text{OH})_2(\text{TCPP})_2(\text{bpy})](\text{DMF})_{15}\}_n$ | virial methods              | 23.5                                       | 11  |

**Table S2** The comparison among anionic metal-organic frameworks used for sensing Fe<sup>3+</sup>

| Fluorescent materials                                                                                                                                                     | Media<br>(aqueous /<br>organic) | Quenching<br>constant <i>K</i> <sub>sv</sub><br>(M <sup>-1</sup> ) | LOD(limit of<br>detection) (M) | Ref.      |
|---------------------------------------------------------------------------------------------------------------------------------------------------------------------------|---------------------------------|--------------------------------------------------------------------|--------------------------------|-----------|
| Tb <sup>3+</sup> @Zn-MOF                                                                                                                                                  | EtOH                            | 3.26 × 10 <sup>4</sup>                                             | 1.67 × 10 <sup>-6</sup>        | this work |
| [(CH <sub>3</sub> ) <sub>2</sub> NH <sub>2</sub> ]·[Tb(bptc)]· <i>x</i> solvents                                                                                          | EtOH                            | /                                                                  | 1.8 × 10 <sup>-4</sup>         | 12        |
| [CH <sub>3</sub> -dpb] <sub>2</sub> [Mg <sub>3</sub> (1,4-NDC) <sub>4</sub> (μ-H <sub>2</sub> O) <sub>2</sub> (CH <sub>3</sub> OH)(H <sub>2</sub> O)]·1.5H <sub>2</sub> O | EtOH                            | 1.6 × 10 <sup>4</sup>                                              | 4.7 × 10 <sup>-4</sup>         | 13        |
| Eu <sup>3+</sup> @bio-MOF-1                                                                                                                                               | H <sub>2</sub> O                | 3.38 × 10 <sup>3</sup>                                             | /                              | 14        |
| {[(CH <sub>3</sub> ) <sub>2</sub> NH <sub>2</sub> ] <sub>4</sub> [Ca <sub>2</sub> Zn <sub>4</sub> (L) <sub>4</sub> ]·4DMF} <sub>n</sub>                                   | H <sub>2</sub> O                | 4.36 × 10 <sup>3</sup>                                             | 1.88 × 10 <sup>-5</sup>        | 15        |
| [H <sub>2</sub> N(CH <sub>3</sub> ) <sub>2</sub> ] <sub>2</sub> [Zn <sub>2</sub> L(HPO <sub>3</sub> ) <sub>2</sub> ]                                                      | H <sub>2</sub> O                | 3.96 × 10 <sup>5</sup>                                             | 1.16 × 10 <sup>-4</sup>        | 16        |
| [H <sub>2</sub> N(CH <sub>3</sub> ) <sub>2</sub> ] <sub>3</sub> [Tb(dipic) <sub>3</sub> ]                                                                                 | H <sub>2</sub> O                | 3.60 × 10 <sup>4</sup>                                             | /                              | 17        |
| [H <sub>2</sub> N(Me) <sub>2</sub> ][Eu <sub>3</sub> (OH)(bpt) <sub>3</sub> (H <sub>2</sub> O) <sub>3</sub> ] (DMF) <sub>2</sub> ·(H <sub>2</sub> O) <sub>4</sub>         | H <sub>2</sub> O                | 3.27 × 10 <sup>4</sup>                                             | /                              | 18        |
| [(CH <sub>3</sub> ) <sub>2</sub> NH <sub>2</sub> ] <sub>6</sub> [Cd <sub>3</sub> L(H <sub>2</sub> O) <sub>2</sub> ]·12H <sub>2</sub> O                                    | H <sub>2</sub> O                | 2.67 × 10 <sup>5</sup>                                             | /                              | 19        |
| {(Me <sub>2</sub> NH <sub>2</sub> )[Eu <sub>3</sub> (PTTBA) <sub>2</sub> ]· <i>x</i> DMF· <i>y</i> H <sub>2</sub> O} <sub>n</sub>                                         | H <sub>2</sub> O                | 4.75 × 10 <sup>4</sup>                                             | 6.32 × 10 <sup>-6</sup>        | 20        |
| [Me <sub>2</sub> NH <sub>2</sub> ][Eu(CPA) <sub>2</sub> (H <sub>2</sub> O) <sub>2</sub> ]                                                                                 | H <sub>2</sub> O                | 1.04 × 10 <sup>4</sup>                                             | 1 × 10 <sup>-7</sup>           | 21        |
| NUC-7                                                                                                                                                                     | H <sub>2</sub> O                | 4.77 × 10 <sup>4</sup>                                             | 6.3 × 10 <sup>-6</sup>         | 22        |
| [(CH <sub>3</sub> ) <sub>2</sub> NH <sub>2</sub> ] <sub>2</sub> [Tb <sub>2</sub> (L) <sub>2</sub> (H <sub>2</sub> O) <sub>2</sub> ]·2DMF·2H <sub>2</sub> O                | H <sub>2</sub> O                | 7.58 × 10 <sup>4</sup>                                             | 5 × 10 <sup>-5</sup>           | 23        |
| {(Me <sub>2</sub> NH <sub>2</sub> )[Zn <sub>2</sub> (L)(H <sub>2</sub> O)]·0.5DMF} <sub>n</sub>                                                                           | DMF                             | 7.83 × 10 <sup>3</sup>                                             | 1.45 × 10 <sup>-5</sup>        | 24        |
| FJI-C8                                                                                                                                                                    | DMF                             | 8.245 × 10 <sup>3</sup>                                            | 2.33 × 10 <sup>-5</sup>        | 25        |
| {(NC <sub>2</sub> H <sub>8</sub> ) <sub>2</sub> [Cd(DMIPA)]· <i>x</i> G} <sub>n</sub>                                                                                     | DMF                             | 3.78 × 10 <sup>4</sup>                                             | 2.9 × 10 <sup>-5</sup>         | 26        |
| JOU-23                                                                                                                                                                    | DMF                             | 5.98 × 10 <sup>4</sup>                                             | 2 × 10 <sup>-6</sup>           | 27        |
| JOU-11                                                                                                                                                                    | DMF                             | 2.66 × 10 <sup>4</sup>                                             | 4.53 × 10 <sup>-6</sup>        | 28        |
| [H <sub>2</sub> N(CH <sub>3</sub> ) <sub>2</sub> ][Cd <sub>4</sub> (Hdpa) <sub>2</sub> (DMA) <sub>2</sub> (H <sub>2</sub> O) <sub>3</sub> ]·1.5DMA·2H <sub>2</sub> O      | DMF                             | 3.77 × 10 <sup>4</sup>                                             | /                              | 29        |
| {[Cd <sub>2</sub> (L)(DMA)]·[H <sub>2</sub> N(Me) <sub>2</sub> ]} <sub>n</sub>                                                                                            | DMA                             | 4.90 × 10 <sup>3</sup>                                             | 1.2 × 10 <sup>-3</sup>         | 30        |
| [Eu(BTEC) <sub>0.5</sub> (HCOO)(H <sub>2</sub> O) <sub>2</sub> ]                                                                                                          | DMSO                            | 3.19 × 10 <sup>4</sup>                                             | /                              | 31        |

**References:**

1. A. Demessence, D. M. D'Alessandro, M. L. Foo and J. R. Long, *J. Am. Chem. Soc.*, 2009, **131**, 8784-8786.
2. M. H. Choi, H. J. Park, D. H. Hong and M. P. Suh, *Chem. Eur. J.*, 2013, **19**, 17432-17438.
3. Y. B. Huang, Z. J. Lin, H. R. Fu, F. Wang, M. Shen, X. S. Wang and R. Cao, *ChemSusChem*, 2014, **7**, 2647-2653.
4. B. Liu, R. Zhang, C. Y. Pan and H. L. Jiang, *Inorg. Chem.*, 2017, **56**, 4263-4266.
5. J. J. Jiao, H. M. Liu, F. L. Chen, D. J. Bai, S. S. Xiong and Y. B. He, *Inorg. Chem. Front.*, 2016, **3**, 1411-1418.
6. Q. G. Zhai, Q. Lin, T. Wu, L. Wang, S. T. Zheng, X. H. Bu and P. Y. Feng, *Chem. Mater.*, 2012, **24**, 2624-2626.
7. H. F. Ma, Q. Y. Liu, Y. L. Wang and S. G. Yin, *Inorg. Chem.*, 2017, **56**, 2919-2925.
8. J. An and N. L. Rosi, *J. Am. Chem. Soc.*, **132**, 5578-5579.
9. E. L. Zhou, P. Huang, C. Qin, K. Z. Shao and Z. M. Su, *J. Mater. Chem. A*, 2015, **3**, 7224-7228.
10. R. Y. Chen, D. Tian, Y. W. Li, Y. B. Lv, H. W. Sun, Z. Chang and X. H. Bu, *RSC Adv.*, 2015, **5**, 24655-24660.
11. G. Ye, L. Chen, X. X. Yin, D. L. Liu, M. N. Wang, Q. F. Zhang, Y. Liu, W. Liu and H. Y. Zhang, *Sep. Sci. Technol.*, 2020, **56**, 36-44.
12. X. L. Zhao, D. Tian, Q. Gao, H. W. Sun, J. Xu and X. H. Bu, *Dalton Trans.*, 2016, **45**, 1040-1046.
13. Z. F. Wu, L. K. Gong and X. Y. Huang, *Inorg. Chem.*, 2017, **56**, 7397-7403.
14. X. Shen and B. Yan, *J. Colloid Interface Sci.*, 2015, **451**, 63-68.

15. W. J. Ji, G. F. Liu, B. Q. Wang, W. B. Lu and Q. G. Zhai, *CrystEngComm*, 2020, **22**, 4710-4715.
16. S. F. Tang and X. M. Hou, *Cryst. Growth Des.*, 2018, **19**, 45-48.
17. H. B. Zhang, P. Hu, Q. K. Zhang, M. D. Huang, C. Z. Lu, V. Malgras, Y. Yamauchi, J. Zhang and S. W. Du, *Chem. Eur. J.*, 2015, **21**, 11767-11772.
18. S. H. Xing, Q. M. Bing, L. F. Song, G. H. Li, J. Y. Liu, Z. Shi, S. H. Feng and R. R. Xu, *Chem. Eur. J.*, 2016, **22**, 16230-16235.
19. B. B. Lu, W. Jiang, J. Yang, Y. Y. Liu and J. F. Ma, *ACS Appl. Mater. Interfaces*, 2017, **9**, 39441-39449.
20. H. T. Chen, L. M. Fan, H. X. Lv and X. T. Zhang, *Inorg. Chem.*, 2020, **59**, 13407-13415.
21. Y. P. Wu, G. W. Xu, W. W. Dong, J. Zhao, D. S. Li, J. Zhang and X. H. Bu, *Inorg. Chem.*, 2017, **56**, 1402-1411.
22. H. T. Chen, L. M. Fan and X. T. Zhang, *ACS Appl. Nano Mater.*, 2020, **3**, 7201-7210.
23. J. J. Huang, J. H. Yu, F. Q. Bai and J. Q. Xu, *Cryst. Growth Des.*, 2018, **18**, 5353-5364.
24. J. Wang, X. R. Wu, J. Q. Liu, B. H. Li, A. Singh, A. Kumar and S. R. Batten, *CrystEngComm*, 2017, **19**, 3519-3525.
25. C. H. Chen, X. S. Wang, L. Li, Y. B. Huang and R. Cao, *Dalton Trans.*, 2018, **47**, 3452-3458.
26. T. Gao, B. X. Dong, Y. M. Pan, W. L. Liu and Y. L. Teng, *J. Solid State Chem.*, 2019, **270**, 493-499.
27. H. Zhang, J. Wu, W. Y. Geng, Y. H. Luo, Z. J. Ding, Z. X. Wang and D. E. Zhang, *J. Solid State Chem.*, 2021, **302**, 122424.
28. Y. H. Luo, A. D. Xie, M. G. Hu, J. Wu, D. E. Zhang and Y. Q. Lan, *Inorg. Chem.*, 2021, **60**, 167-174.
29. J. C. Jin, L. Y. Pang, G. P. Yang, L. Hou and Y. Y. Wang, *Dalton Trans.*, 2015, **44**, 17222-17228.
30. Y. T. Yan, J. Liu, G. P. Yang, F. Zhang, Y. K. Fan, W. Y. Zhang and Y. Y. Wang, *CrystEngComm*, 2018, **20**, 477-486.
31. Y. W. Shi, J. W. Ye, Y. Qi, M. A. Akram, A. Rauf and G. L. Ning, *Dalton Trans.*, 2018, **47**, 17479-17485.
